# Supplementary material for: In vitro fermentation of glycosaminoglycans from mackerel fish waste and its role in modulating the antioxidant status and gut microbiota of high fat diet-fed C57BL/6 mice
Source: Royal Society of Chemistry journal article supplement (doi:10.1039/d2fo03603g), 2023-01-01
Supplement: d2fo03603g1.pdf [file d2fo03603g1.pdf]

## Supplementary data

**Table S1: Diet composition of basal AIN-93 (g/kg diet)**

| <b>Composition</b>        | <b>SFD</b> | <b>HFD</b> | <b>OFD</b> | <b>GFD1</b> | <b>GFD2</b> |
|---------------------------|------------|------------|------------|-------------|-------------|
| <b>Corn Starch</b>        | 550        | 180        | 180        | 180         | 180         |
| <b>Casein</b>             | 200        | 200        | 200        | 200         | 200         |
| <b>Sucrose</b>            | 100        | 100        | 100        | 100         | 100         |
| <b>Soyabean Oil</b>       | 70         | -          | -          | -           | -           |
| <b>Cellulose</b>          | 50         | 50         | 50         | 50          | 50          |
| <b>Mineral Mix</b>        | 35         | 35         | 35         | 35          | 35          |
| <b>Vitamin Mix</b>        | 10         | 10         | 10         | 10          | 10          |
| <b>L- Methionine</b>      | 3          | 3          | 3          | 3           | 3           |
| <b>Choline bitartrate</b> | 2          | 2          | 2          | 2           | 2           |
| <b>Lard</b>               | -          | 400        | 400        | 400         | 400         |
| <b>Cholesterol</b>        | -          | 20         | 20         | 20          | 20          |
| <b>Test compound</b>      | -          | -          | 0.380      | 0.380       | 0.760       |

**Abbreviations:** SFD- Starch fed diet, HFD-High fat diet, OFD-orlistat fed diet (positive control), GFD1& 2: e-GAGs fed at 380 & 760 mg/kg diet along with high fat diet. Mineral and vitamin mixtures were followed according to (AIN-93)

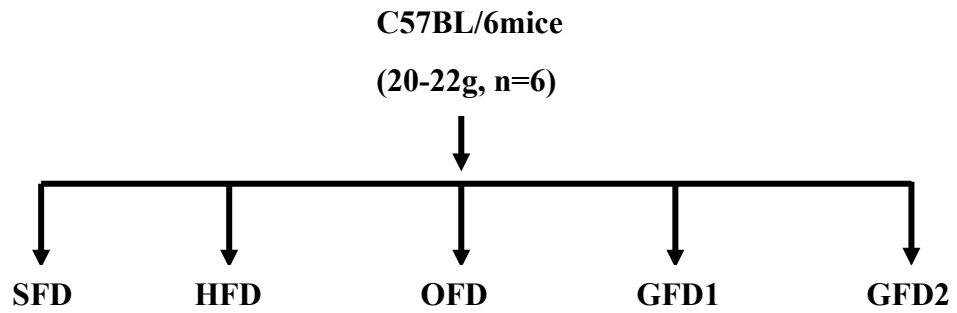

### **Animal grouping**

**SFD-** Starch fed diet group

**HFD-** High fat fed diet group

**OFD-** Orlistat fed diet group (380mg/kg diet) along with HFD

**GFD1-** e-GAGs fed diet group1 (380mg/kg diet) along with HFD

**GFD2-** e-GAGs fed diet group2 (760mg/kg diet) along with HFD

**Figure. S1: Experimental design for the animal experiment**

**Table.S2:** Effect of e-GAGs on cecum microbes. Cell count (CFU/g) of high fat fed C57BL/6 mice

| <b>Groups</b> | <b>LAB</b>               | <i>Bacillus</i>         | <i>Coliforms</i>        | <i>S.aureus</i>         | <i>Clostridium</i>      | <i>Camphylo</i>         | <i>Bacteriodes</i>      |
|---------------|--------------------------|-------------------------|-------------------------|-------------------------|-------------------------|-------------------------|-------------------------|
| <b>SFD</b>    | 12.77 ±0.01 <sup>a</sup> | 9.69 ±0.00 <sup>a</sup> | 9.16 ±0.01 <sup>a</sup> | 7.57 ±0.02 <sup>a</sup> | 5.61 ±0.00 <sup>a</sup> | 5.95 ±0.00 <sup>a</sup> | 7.86 ±0.01 <sup>a</sup> |
| <b>HFD</b>    | 12.12 ±0.01 <sup>b</sup> | 9.91 ±0.00 <sup>b</sup> | 9.28 ±0.02 <sup>a</sup> | 7.86 ±0.01 <sup>b</sup> | 5.87 ±0.00 <sup>b</sup> | 6.18 ±0.00 <sup>a</sup> | 5.74 ±0.01 <sup>b</sup> |
| <b>OFD</b>    | 12.46 ±0.00 <sup>c</sup> | 9.84 ±0.00 <sup>b</sup> | 9.21 ±0.02 <sup>a</sup> | 7.69 ±0.01 <sup>c</sup> | 5.70 ±0.00 <sup>c</sup> | 6.11 ±0.00 <sup>a</sup> | 6.77 ±0.01 <sup>c</sup> |
| <b>GFD1</b>   | 12.44 ±0.01 <sup>c</sup> | 9.85 ±0.01 <sup>b</sup> | 9.23 ±0.01 <sup>a</sup> | 7.71 ±0.01 <sup>c</sup> | 5.72 ±0.00 <sup>c</sup> | 6.15 ±0.00 <sup>a</sup> | 6.71 ±0.00 <sup>c</sup> |
| <b>GFD2</b>   | 12.58 ±0.00 <sup>c</sup> | 9.79 ±0.00 <sup>c</sup> | 9.22 ±0.58 <sup>a</sup> | 7.70 ±0.01 <sup>c</sup> | 5.69 ±0.01 <sup>a</sup> | 6.12 ±0.00 <sup>a</sup> | 6.79 ±0.03 <sup>c</sup> |

Abbreviations for Animal groups. SFD; Starch Fed Diet, HFD; High Fat Diet (40% fat), OFD; Orlistat Fat Diet (380mg/kg diet), GFD1 & GFD2; Extracted GAGs Fed Diet 380 & 760mg/kg diet.

Data values are means ± SEM (n=6). Means in the table not sharing a common alphabet/superscript in column are significantly different at  $P < 0.05$ .
